# Supplementary material for: Psychometric properties of a screening tool for autism in the community—The Indian Autism Screening Questionnaire (IASQ)
Source: PLOS journal article supplement (doi:10.1371/journal.pone.0249970), 2021-04-22
Supplement: S1 (10.1371/journal.pone.0249970.s001) [file journal.pone.0249970.s001]

S1 Fig.

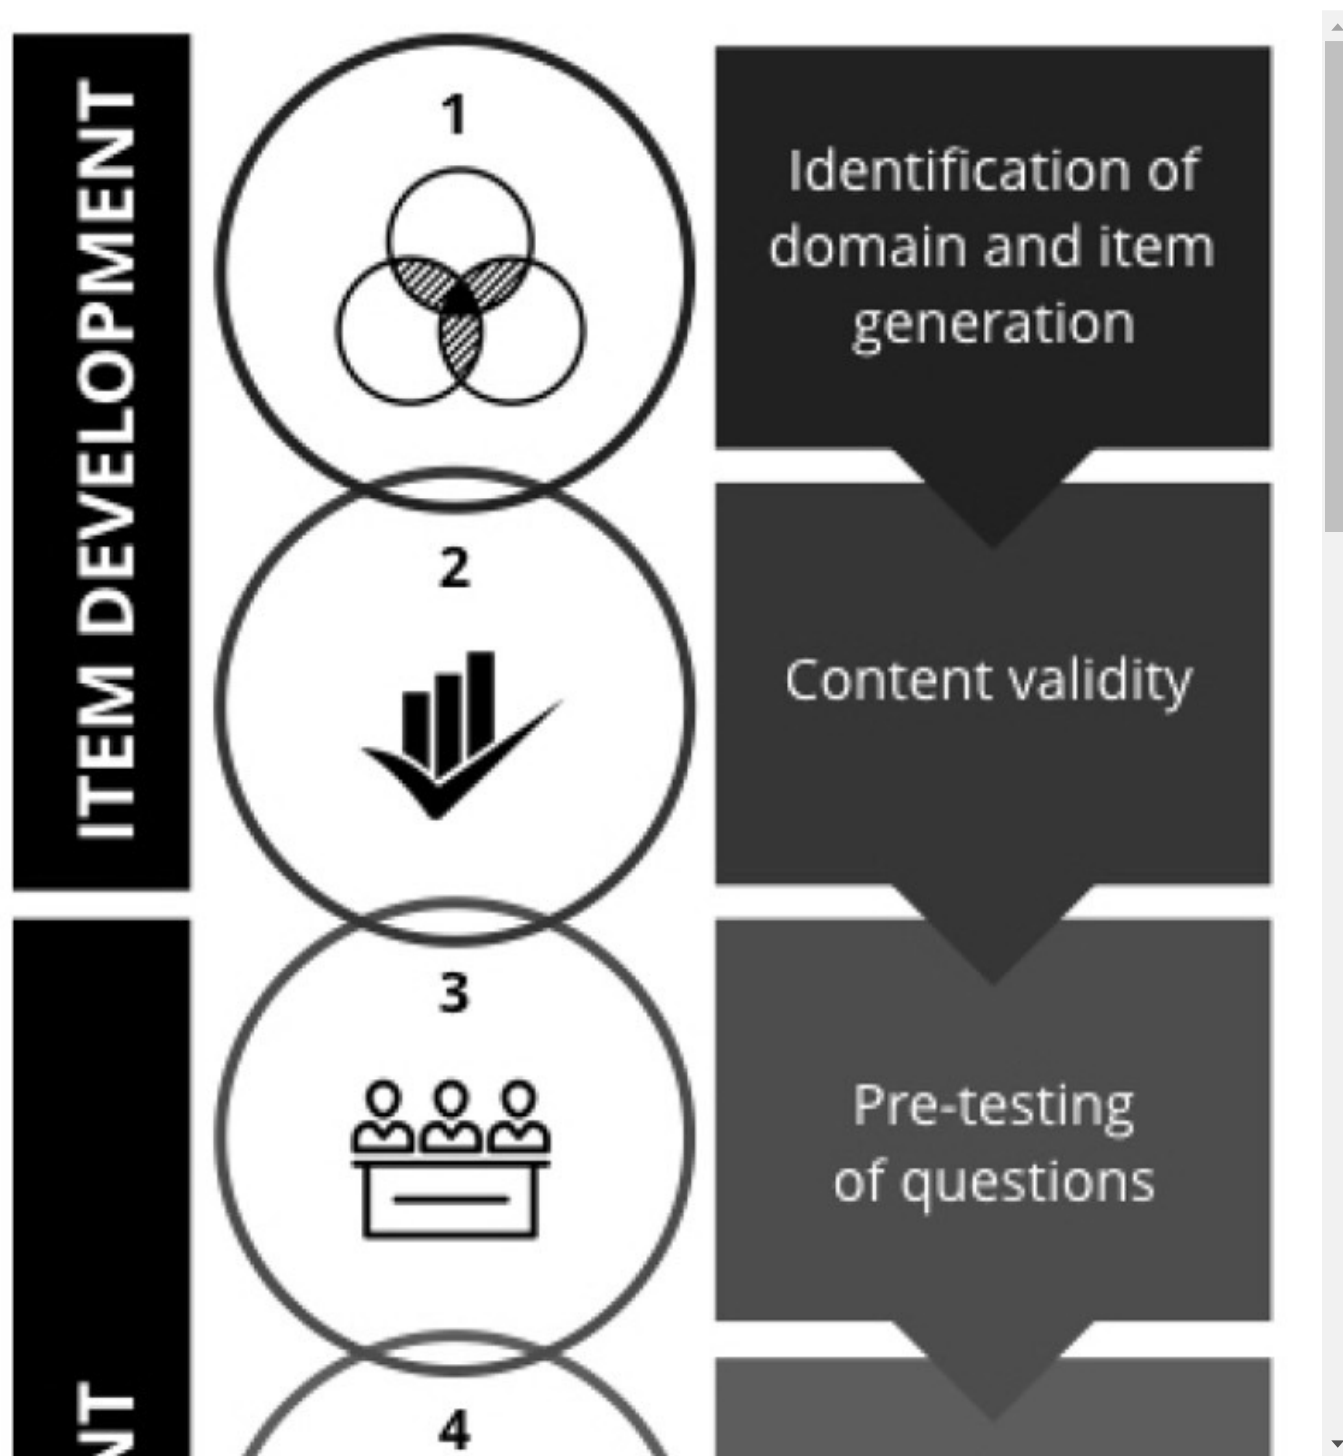

An overview of the three phases and nine steps of scale development and validation.
