# Supplementary material for: Psychometric properties of a screening tool for autism in the community—The Indian Autism Screening Questionnaire (IASQ)
Source: PLoS One. 2021 Apr 22;16(4):e0249970. doi: 10.1371/journal.pone.0249970 (PMC8062015; doi:10.1371/journal.pone.0249970)
Supplement: S1 File — (XLSX) [file pone.0249970.s005.xlsx]

## Sheet: clean data
SL NO.	Family ID	Date of Interview	Gender Child/male 0/female 1	Child Age	Currently Studying	Type of School	Total Score of IASQ	IASQ Giag	Family ID	Clinical Diagnosis of child	Clinical Diagnosis of child autism 1, no autism 0	Annual family income in rupees	ISAA Score	ISAA diag
101	101	24-09-2018	0	17	No	Open School	8	1	101	Autism	1	1500000	72	1
102	102	22-09-2018	1	5.6	Yes	General	8	1	102	Autism	1	600000	94	1
103	103	19-09-2018	0	3.3	No	N/A	0	0	103	No Autism with ID	0	48000	68	0
104	104	19-09-2018	1	16.5	Yes	General	4	1	104	No Autism with SLD	0	1200000	66	0
105	105	19-09-2018	0	7.9	No	N/A	7	1	105	Autism	1	84000	109	1
106	106	18-09-2018	0	9	Yes	General	0	0	106	No Autism	0	96000	66	0
107	107	18-09-2018	1	11	Yes	General	0	0	107	No Autism with ID	0	96000	54	0
108	108	17-09-2018	1	5.11	Yes	General	4	1	108	Autism	1	1800000	93	1
109	109	17-09-2018	0	14	Yes	Special	0	0	109	No Autism with ID	0	144000	61	0
110	110	15-09-2018	0	17	Yes	General	8	1	110	Autism	1	1800000	95	1
111	111	15-09-2018	1	4.2	No	N/A	0	0	111	No Autism with ID	0	132000	65	0
112	112	16-02-2018	0	9	Yes	General	8	1	112	Autism	1	600000	113	1
113	113	14-09-2018	0	8	Yes	General	8	1	113	Autism	1	70000	115	1
114	114	14-09-2018	0	17	Yes	General	0	0	114	No Autism with Behavioral issues	0	480000	47	0
115	115	14-09-2018	0	12	Yes	General	0	0	115	No Autism with Borderline IQ	0	150000	45	0
116	116	14-09-2018	0	15	Yes	Open School	0	0	116	Autism	1	480000	75	1
117	117	07-09-2018	0	17	Yes	General	5	1	117	No Autism with ID, Behavioral issues	0	600000	58	0
118	118	01-02-2018	1	4.9	No	N/A	7	1	118	Autism	1	600000	92	1
119	119	27-09-2018	0	13.8	Yes	General	0	0	119	No Autism with ID	0	120000	58	0
120	120	27-09-2018	0	8	Yes	General	0	0	120	No Autism with SLD, ADHD	0	144000	44	0
121	121	06-06-2018	0	11	Yes	General	1	1	121	No Autism with Behavioral issues	0	60000	51	0
122	122	08-09-2018	0	5	Yes	Special	10	1	122	Autism	1	660000	147	1
123	123	04-06-2018	0	12	Yes	General	2	1	123	Autism	1	120000	72	1
124	124	04-06-2018	0	13	No	Special	8	1	124	Autism	1		105	1
125	125	12-03-2018	0	11	Yes	General	7	1	125	No Autism with ID, Behavioral issues	0	276000	65	0
126	127	13-08-2018	0	3.5	Yes	General	0	0	127	No Autism	0	252000	62	0
127	128	12-09-2018	1	6.6	Yes	General	0	0	128	No Autism with SLD	0	95000	40	0
128	129	17-10-2017	0	11	Yes	Special	8	1	129	Autism	1	600000	101	1
129	130	04-06-2018	0	11	Yes	General	0	0	130	No Autism with ID	0	50000	60	0
130	131	29-06-2018	0	13	Yes	General	8	1	131	Autism	1	900000	127	1
131	132	25-10-2017	1	4	Yes	General	6	1	132	Autism	1	744000	78	1
132	133	28-09-2018	0	3.1	No	N/A	0	0	133	No Autism with ADHD	0	960000	58	0
133	134	11-09-2018	0	8.9	Yes	Special	1	1	134	No Autism with Behavioral issue	0	200000	46	0
134	135	11-09-2018	1	11	Yes	General	0	0	135	No Autism with ID	0	216000	52	0
135	136	28-09-2018	1	4.6	No	N/A	6	1	136	Autism	1	120000	108	1
136	137	28-09-2018	0	11.4	Yes	General	0	0	137	No Autism with ADHD	0	2400000	49	0
137	138	23-07-2018	0	5.3	Yes	Special	10	1	138	Autism	1	1320000	105	1
138	139	29-09-2018	1	3	Yes	General	0	0	139	No Autism with Partial Hearing difficulty	0	180000	47	0
139	140	06-09-2018	0	6.8	Yes	General	6	1	140	Autism	1	240000	115	1
140	141	10-01-2018	0	4.4	Yes	General	7	1	141	Autism	1	540000	107	1
141	142	07-09-2018	0	15	Yes	integrated	7	1	142	No Autism with ID	0	600000	64	0
142	143	27-09-2018	1	12	Yes	General	0	0	143	No Autism with Behavioral issues	0	144000	52	0
143	144	17-01-2018	0	18	Yes	Special	10	1	144	Autism	1	2400000	155	1
144	145	10-09-2018	0	12	Yes	General	5	1	145	No Autism with SLD	0	216000	49	0
145	146	06-09-2018	0	11	Yes	Special	9	1	146	Autism	1	240000	142	1
146	147	09-02-2018	1	9	No	N/A	8	1	147	Autism	1	84000	144	1
147	148		1	12	Yes	General	0	0	148	No Autism with ID	0	96000	40	0
148	149	17-01-2018	1	12	No	N/A	4	1	149	Autism	1	102000	80	1
149	150	01-10-2018	0	2	Yes	General	0	0	150	No Autism	0	96000	42	0
150	151	01-10-2018	0	9	Yes	General	0	0	151	No Autism	0	144000	61	0
151	152	01-10-2005	0	13	Yes	Special	7	1	152	Autism	1	1680000	99	1
152	153	03-10-2018	0	7.9	Yes	General	6	1	153	Autism	1	240000	70	1
153	154	03-10-2018	0	8.8	Yes	General	3	1	154	No Autism	0	96000	47	0
154	155	04-10-2018	0	4.8	No	N/A	7	1	155	Autism	1	480000	94	1
155	156	05-10-2018	0	10	Yes	General	7	1	156	Autism	1	120000	76	1
156	157	05-10-2018	0	11.4	Yes	General	0	0	157	No Autism with SLD	0	240000	40	0
157	158	05-10-2018	0	4.9	Yes	General	0	0	158	No Autism with ADHD	0	300000	45	0
158	159	06-10-2018	0	4	No	N/A	7	1	159	Autism	1	180000	100	1
159	160	09-10-2018	0	15	Yes	General	7	1	160	Behavioral issues	0	2400000	47	0
160	161	11-10-2018	0	12	Yes	Special	7	1	161	Autism	1	300000	85	1
161	162	11-10-2018	0	4	Yes	General	0	0	162	No Autism with ID	0	168000	67	0
162	163	12-10-2018	0	10	Yes	Special	10	1	163	Autism	1	96000	99	1
163	164	13-10-2018	0	9	Yes	integrated	8	1	164	Autism with ID, Seizure	1	348000	66	0
164	165	16-10-2018	0	7	No	N/A	8	1	165	Autism	1	720000	97	1
165	166	16-10-2018	1	15	Yes	General	6	1	166	Autism	1	900000	72	1
166	167	17-10-2018	1	6	Yes	integrated	9	1	167	Autism	1	1524000	119	1
167	168	18-10-2018	0	6	Yes	General	0	0	168	No Autism with ID	0	250000	41	0
168	169	18-10-2018	0	16	No	N/A	8	1	169	Autism	1	288000	114	1
169	170	18-10-2018	0	18	Yes	General	0	0	170	No Autism	0	48000	43	0
170	171	18-10-2018	0	5	Yes	General	1	1	171	Autism	1	500000	87	1
171	172	16-10-2017	0	3	No	N/A	2	1	172	No Autism with ID	0	300000	56	0
172	173	22-10-2018	0	16	Yes	General	0	0	173	No Autism with ID	0	840000	45	0
173	174	22-10-2018	1	7	No	N/A	0	0	174	No Autism with Meningitis	0	300000	40	0
174	175	23-10-2018	1	10	Yes	General	0	0	175	No Autism with SLD	0	960000	46	0
175	176	23-10-2018	1	7	Yes	integrated	5	1	176	Autism	1	1400000	117	1
176	177	23-10-2018	0	16	Yes	General	9	1	177	Autism	1	1560000	72	1
177	178	25-10-2018	0	2	No	N/A	8	1	178	Autism	1	240000	98	1
178	179	26-10-2018	1	4	No	N/A	8	1	179	Autism	1	120000	105	1
179	180	29-10-2018	0	7	Yes	General	3	1	180	Autism	1	540000	98	1
180	181	29-10-2018	0	4	No	N/A	2	1	181	(borderline, Hyper-active behavior on higher side) 69	0	72000	69	0
181	182	09-10-2018	1	3	Yes	General	8	1	182	Autism	1	840000	92	1
182	183	29-10-2018	0	6	Yes	Special	8	1	183	Autism	1	108000	87	1
183	184	20-10-2018	0	6	Yes	General	8	1	184	Autism	1	480000	89	1
184	185	29-10-2018	1	3	Yes	General	1	1	185	No Autism with ID	0	420000	68	0
185	186	29-10-2018	0	12	Yes	Special	8	1	186	Autism	1	288000	125	1
186	187	31-10-2018	1	10	No	N/A	4	1	187	Autism	1	120000	99	1
187	188	02-11-2018	0	4	Yes	General	2	1	188	No Autism with ID	0	360000	67	0
188	189	02-11-2018	0	3	Yes	General	8	1	189	Autism	1	800000	113	1
189	190	05-11-2018	0	15	Yes	integrated	6	1	190	Autism	1	400000	74	1
190	191	08-11-2018	0	11	Yes	General	5	1	191	No Autism	0	144000	55	0
191	192	12-11-2018	0	4	Yes	General	7	1	192	Autism	1	2000000	90	1
192	193	12-11-2018	0	14	Yes	General	0	0	193	No Autism with SLD	0	1800000	59	0
193	194	12-11-2018	0	5	Yes	General	9	1	194	Autism	1	132000	105	1
194	195	14-12-2011	0	6	Yes	Special	6	1	195	Autism	1	840000	99	1
195	196	13-11-2018	0	3	Yes	General	5	1	196	Autism	1	1440000	72	1
196	197	15-11-2018	0	9	Yes	General	9	1	197	Autism	1	1300000	106	1
197	198	20-11-2018	0	3	Yes	General	7	1	198	Autism	1	480000	81	1
198	199	20-11-2018	1	3	Yes	General	2	1	199	No Autism with Behavioral issues	0	420000	53	0
199	201	28-11-2018	0	4	Yes	General	0	0	201	No Autism with ID	0	180000	61	0
200	202	30-11-2018	0	4	Yes	General	2	1	202	No Autism	0	210000	56	0
201	203	30-11-2018	0	5	Yes	General	5	1	203	Autism	1	1200000	82	1
202	204	03-11-2018	0	14	Yes	General	6	1	204	Autism with Borderline IQ	1	960000	70	1
203	205	04-12-2018	0	5	Yes	General	4	1	205	Autism	1	84000	89	1
204	209	14-12-2018	0	11	Yes	General	0	0	209	No Autism with ID, Seizure	0	72000	41	0
205	211	17-12-2018	0	10	Yes	General	8	1	211	Autism	1	600000	107	1
206	213	17-12-2018	0	3.5	Yes	General	7	1	213	Autism	1	720000	109	1
207	214	21-12-2018	0	4	Yes	General	7	1	214	Autism	1	2400000	101	1
208	215	21-12-2018	0	16	Yes	General	6	1	215	Autism	1	2400000	72	1
209	219	26-12-2018	0	3.5	Yes	General	2	1	219	Autism	1	1440000	85	1
210	222	28-12-2018	0	5	Yes	Special	8	1	222	Autism	1	480000	109	1
211	226	01-01-2019	0	3	Yes	General	4	1	226	Autism	1	1800000	97	1
212	228	08-01-2019	0	5	Yes	General	2	1	228	Autism	1	240000	85	1
213	229	09-01-2019	0	4.11	No	N/A	8	1	229	Autism	1	216000	102	1
214	231	14-01-2019	1	8	Yes	Special	0	0	231	No Autism with ID	0	400000	47	0
215	232	14-01-2019	0	6	No	N/A	9	1	232	Autism	1	180000	87	1
216	233	14-01-2019	0	6	Yes	General	8	1	233	Autism	1	3000000	105	1
217	238	23-01-2019	0	7	Yes	General	4	1	238	Autism	1	168000	86	1
218	239	23-01-2019	1	16	Yes	integrated	7	1	239	Autism	1	3000000	99	1
219	242	19-01-2019	1	9	Yes	General	1	1	242	No Autism with ID	0	1200000	69	0
220	243	25-01-2019	0	11	Yes	integrated	4	1	243	Autism	1	900000	84	1
221	244	28-01-2019	0	9	Yes	General	0	0	244	No Autism with ID	0	240000	61	0
222	245	29-01-2019	0	3	Yes	General	8	1	245	Autism	1	600000	132	1
223	246	29-01-2019	0	12	Yes	General	8	1	246	Autism	1	144000	109	1
224	248	31-01-2019	0	3	No	N/A	6	1	248	Autism	1	1700000	97	1
225	250	06-02-2019	0	4	Yes	General	3	1	250	Autism	1	600000	107	1
226	251	06-02-2019	0	6	Yes	General	7	1	251	Autism	1	840000	101	1
227	252	12-02-2019	0	5	No	N/A	6	1	252	Autism	1	2000000	94	1
228	253	13-02-2019	0	4	Yes	General	0	0	253	No Autism with ID	0	600000	45	0
229	255	14-02-2019	0	6	Yes	General	6	1	255	Autism	1	660000	104	1
230	258	19-02-2019	0	13.8	Yes	integrated	9	1	258	Autism	1	240000	81	1
231	259	20-02-2019	1	5	No	N/A	3	1	259	Autism	1	96000	79	1
232	260	20-02-2019	0	10	No	N/A	8	1	260	Autism	1	240000	101	1
233	262	21-01-2019	0	10.3	Yes	General	7	1	262	No Autism	0	240000	54	0
234	263	21-02-2019	0	5.4	Yes	General	9	1	263	Autism	1	144000	100	1
235	264	21-02-2019	0	4.8	Yes	General	5	1	264	Autism	1	780000	83	1
236	265	26-02-2019	1	9	No	N/A	6	1	265	No Autism with ID	0	48000	66	0
237	266	27-02-2019	0	3.11	Yes	General	8	1	266	Autism	1	2400000	103	1
238	268	28-02-2019	0	7	Yes	Special	8	1	268	Autism	1	264000	99	1
239	278	19-03-2019	1	5.11	Yes	General	8	1	278	Autism	1	600000	72	1
240	279	23-03-2019	1	6	Yes	General	7	1	279	Autism	1	720000	106	1
241	282	25-03-2019	0	14	Yes	General	8	1	282	Autism	1		88	1
242	283	19-05-2007	0	11	Yes	integrated	9	1	283	Autism	1	1500000	100	1
243	284	26-03-2019	0	13	Yes	General	1	1	284	No Autism with ID	0	300000	64	0
244	286	01-04-2019	0	13	Yes	integrated	6	1	286	Autism	1	1800000	87	1
245	287	01-04-2019	0	4	Yes	General	4	1	287	Autism	1	1200000	77	1

## Sheet: reliability data
SlNo	Qs1	Qs2	Qs3	Qs4	Qs5	Qs6	Qs7	Qs8	Qs9	Qs10	Total	Retest_Qs1	Retest_Qs2	Retest_Qs3	Retest_Qs4	Retest_Qs5	Retest_Qs6	Retest_Qs7	Retest_Qs8	Retest_Qs9	Retest_Qs10	Retest_Total
1	1	0	1	1	1	1	1	1	0	1	8	0	0	0	1	0	1	0	1	0	0	3
2	1	0	1	1	1	1	1	1	0	0	7	1	1	1	1	1	1	1	1	1	1	10
3	1	0	0	0	1	1	1	0	0	1	5	0	0	0	1	0	1	1	0	0	0	3
4	0	1	1	1	1	0	1	0	0	0	5	1	1	0	0	0	0	0	0	0	0	2
5	0	0	0	0	0	0	0	0	0	0	0	0	0	0	0	1	0	0	0	0	1	2
6	0	0	0	1	0	0	1	1	0	1	4	1	0	0	0	1	1	1	1	0	1	6
7	1	0	0	0	0	1	1	0	0	0	3	1	1	1	0	1	1	1	1	0	1	8
8	0	0	0	0	0	0	0	0	1	1	2	0	0	0	0	0	0	0	0	0	1	1
9	0	0	0	0	1	0	1	1	1	0	4	1	1	1	1	1	1	1	1	0	0	8
10	1	1	1	1	1	1	1	0	0	0	7	1	1	0	1	0	1	1	0	0	1	6
11	0	0	0	0	0	0	0	0	0	0	0	0	0	0	0	0	0	1	0	0	0	1
12	0	0	0	0	0	0	1	0	0	0	1	0	0	0	0	0	0	1	0	0	0	1
13	1	1	1	1	0	1	1	0	0	0	6	1	0	1	0	1	1	1	1	0	0	6
14	0	0	0	0	0	0	0	0	0	0	0	0	0	0	0	0	0	0	0	0	0	0
15	1	1	1	1	1	1	1	1	1	1	10	1	0	1	1	1	1	1	1	1	1	9
16	0	0	0	0	0	0	0	0	0	0	0	0	0	1	1	0	1	1	0	0	0	4
17	0	1	1	1	1	1	1	1	0	0	7	0	0	0	1	0	1	1	0	0	0	3
18	1	0	1	1	1	1	1	1	1	0	8	0	0	0	0	0	1	1	1	0	0	3
19	0	0	0	1	1	1	1	0	0	0	4	1	0	0	0	0	1	1	0	0	0	3
20	1	1	1	1	1	1	1	1	0	1	9	1	1	1	1	1	1	1	1	1	1	10
21	0	0	0	0	0	0	0	0	0	0	0	0	0	1	0	1	1	1	0	1	0	5
22	0	0	0	0	0	0	0	0	0	0	0	0	0	0	0	0	0	0	0	0	0	0
23	1	0	1	1	0	1	1	0	1	0	6	0	0	0	0	0	0	0	0	0	0	0
24	1	0	1	0	1	1	1	1	1	0	7	1	0	1	0	1	1	1	1	1	0	7
25	1	1	1	1	0	1	1	1	0	1	8	1	1	1	0	1	1	1	0	1	0	7
26	1	1	1	1	1	1	1	1	0	0	8	1	1	1	1	1	1	1	0	0	0	7
27	1	1	1	1	1	1	1	0	0	0	7	0	0	0	1	1	1	1	1	1	1	7
28	1	0	1	1	1	1	1	1	0	0	7	1	0	1	1	1	1	1	1	0	1	8
29	1	1	1	1	1	1	1	1	1	0	9	1	1	1	1	1	1	1	0	1	0	8
30	1	0	0	0	1	1	1	1	0	0	5	1	1	1	0	1	1	1	1	1	0	8
31	1	0	1	1	1	1	1	1	0	0	7	1	0	1	1	0	1	1	1	0	1	7
32	1	1	0	1	0	0	1	0	0	0	4	1	1	1	1	1	1	1	0	0	0	7
33	1	0	1	1	0	1	1	1	0	1	7	1	1	0	1	0	1	1	1	0	1	7
34	0	0	0	0	0	0	0	0	0	0	0	0	0	0	0	0	1	1	0	0	0	2
35	1	0	0	0	1	1	1	0	0	0	4	1	0	1	0	0	1	1	0	0	1	5
36	0	0	0	0	0	0	0	0	0	0	0	0	0	0	0	0	0	0	0	0	0	0
37	0	0	0	0	0	0	0	0	0	0	0	0	0	0	0	0	0	0	0	0	0	0
38	0	1	1	1	1	1	1	0	1	0	7	0	1	1	0	1	1	1	1	1	0	7
39	1	0	0	1	0	1	1	0	0	0	4	1	1	0	0	0	1	1	1	0	1	6
40	1	1	1	1	1	1	1	1	1	1	10	1	1	1	1	1	1	1	1	1	1	10
41	0	0	0	0	0	0	0	0	0	0	0	0	0	0	0	0	0	0	0	0	0	0
42	0	0	0	0	0	0	0	0	0	0	0	0	0	0	0	0	0	0	0	0	0	0
43	1	1	1	1	1	1	1	1	1	1	10	1	1	1	1	1	1	1	1	1	1	10
44	1	0	1	1	1	1	1	1	0	0	7	1	1	1	1	0	1	1	1	0	0	7
45	0	0	1	0	0	0	0	0	0	0	1	0	0	0	0	0	0	0	0	0	0	0
46	1	1	1	1	1	1	1	0	0	0	7	1	0	1	1	1	1	1	1	0	0	7
47	1	0	0	0	1	1	1	1	0	1	6	1	0	0	0	1	1	1	1	1	1	7
48	0	0	0	0	0	0	0	0	0	0	0	0	1	0	0	1	1	0	0	0	0	3
49	1	0	1	1	1	1	1	1	0	1	8	1	0	1	1	1	1	1	1	0	1	8
50	0	0	0	0	0	0	0	0	0	0	0	0	0	0	0	0	0	0	0	0	0	0
51	1	0	1	1	1	1	1	1	1	0	8	1	1	1	1	1	1	1	1	0	0	8
52	0	0	0	0	0	0	0	0	0	0	0	0	0	0	0	0	1	0	0	0	0	1
53	1	1	1	1	1	1	1	1	0	0	8	1	1	1	1	1	1	1	1	0	0	8
54	0	0	0	0	0	0	0	0	0	0	0	0	0	0	0	0	0	0	0	0	0	0
55	1	0	1	1	1	1	1	0	0	1	7	1	0	1	1	0	1	1	1	1	1	8
56	0	0	0	0	0	0	0	0	0	0	0	0	0	0	0	0	0	0	0	0	0	0
57	0	1	1	1	1	1	1	0	1	0	7	0	0	0	0	0	0	0	0	0	0	0
58	1	1	1	1	1	1	1	1	0	0	8	1	1	1	1	1	1	1	1	0	0	8
59	0	0	0	0	0	0	0	0	0	0	0	0	0	0	0	0	0	0	0	0	0	0
60	0	0	0	0	0	0	0	0	0	0	0	0	0	0	0	0	0	0	0	0	0	0
