# Supplementary material for: Psychometric properties of a screening tool for autism in the community—The Indian Autism Screening Questionnaire (IASQ)
Source: PLOS journal article supplement (doi:10.1371/journal.pone.0249970), 2021-04-22
Supplement: S6 (10.1371/journal.pone.0249970.s006) [file journal.pone.0249970.s006]

**भारतीय ऑटिज्म जांच प्रश्नावली (IASQ)**  
**INDIAN AUTSIM SCREENING**  
**QUESTIONARE (IASQ)**

आईडी नंबर/ ID No

परीक्षक/ Examiner.

जन्म की तारीख/ Date of birth. आयु/ Age/लिंग/ Sex.

निदान/Diagnosis.

कृपया सही प्रतिक्रिया पर टिक करें/ Please tick the correct response.

क्या आपका बच्चा/बच्ची/ Does your child

| Sr. No. | Question                                                                                                                                              | हाँ<br>Yes | नहीं<br>No |
|---------|-------------------------------------------------------------------------------------------------------------------------------------------------------|------------|------------|
| 1       | आंखों से आंखें कम मिलाता/ती है?<br>Have poor eye contact?                                                                                             |            |            |
| 2       | सामाजिक स्थिति में मुस्कुराहट की कमी है?<br>Lack social smile?                                                                                        |            |            |
| 3       | अलग-थलग रहता/ती है?<br>Remain aloof?                                                                                                                  |            |            |
| 4       | लोगों से स्वयं बढ़कर सम्पर्क नहीं करता/ती है?<br>Not reach out to others?                                                                             |            |            |
| 5       | अकेले और दोहराने वाले खेल खेलता/ती है?<br>Engage in solitary and repetitive play activities?                                                          |            |            |
| 6       | अपने साथ के बच्चों से सम्बन्ध नहीं बनाए रख पाता/ती है?<br>Not maintain peer relationships?                                                            |            |            |
| 7       | लोगों के साथ न ही बातचीत की शुरुवात, और न ही उसे बनाए रख पाता/पाती है?<br>Is unable to initiate or sustain conversation with others?                  |            |            |
| 8       | एक ही प्रकार की शारीरिक क्रियाओं को बार-बार दोहराता/ती है?<br>Engage in stereotyped and repetitive motor mannerisms?                                  |            |            |
| 9       | निर्जीव वस्तुओं से लगाव दिखाता/ती है?<br>Show attachment to inanimate objects?                                                                        |            |            |
| 10      | वस्तुओं या व्यक्तियों को, असामान्य रूप से सूँघकर, छूकर, या चखकर देखता/ती है?<br>Respond to objects/people unusually by smelling, touching or tasting? |            |            |

कुल (हाँ)/ Total(Yes)\_\_\_\_\_

हस्ताक्षर/Signature\_\_\_\_\_

कुल (नहीं)/ Total(No)\_\_\_\_\_

तारीख/Date\_\_\_\_\_

| <u>Supplementary and Explanatory Questions to IASQ</u> |                                                                                                                                                                                                                                                                                                                              | IASQ के लिए पूरक और व्याख्यात्मक प्रश्न                                                                                                                                                                                                                                                                                                                                                                                                                                                                                     |
|--------------------------------------------------------|------------------------------------------------------------------------------------------------------------------------------------------------------------------------------------------------------------------------------------------------------------------------------------------------------------------------------|-----------------------------------------------------------------------------------------------------------------------------------------------------------------------------------------------------------------------------------------------------------------------------------------------------------------------------------------------------------------------------------------------------------------------------------------------------------------------------------------------------------------------------|
| 1.                                                     | <b>Have poor eye contact?</b>                                                                                                                                                                                                                                                                                                | आंखों के संपर्क में कमी                                                                                                                                                                                                                                                                                                                                                                                                                                                                                                     |
|                                                        | <ul style="list-style-type: none"> <li>Does the child look at you when you call him/her?</li> <li>While asking something does he/she look at you?</li> <li>Does the child get fussy when forced to look at people?</li> </ul>                                                                                                | <ul style="list-style-type: none"> <li>क्या बुलाने पर बच्चा/बच्ची आपकी तरफ देखता/देखती है?</li> <li>कुछ पूछते समय क्या वह आपकी तरफ देखता/देखती है?</li> <li>बच्चे को बुला के जांच करिए क्या वह आपकी तरफ देखता/देखती है, आप माता-पिता को भी बच्चा/बच्ची को बुलाने को कहकर उसकी आंख का संपर्क जांच सकते हैं।</li> <li>क्या लोगों से आंख मिलाने के लिए जबरदस्ती करने पर वह चिढ़ जाता/जाती है?</li> <li>अगर बच्चा/बच्ची आंख मिलाता/मिलाती है तो कितनी बार तथा कितनी देर के लिए संपर्क बनाए रखता है, इसकी जांच कीजिए।</li> </ul> |
| 2.                                                     | <b>Lack social smile?</b>                                                                                                                                                                                                                                                                                                    | सामाजिक मुस्कान में कमी                                                                                                                                                                                                                                                                                                                                                                                                                                                                                                     |
|                                                        | <ul style="list-style-type: none"> <li>Does the child smile in response to familiar people (Grandparents, relatives/friends)?</li> <li>Does the child smile when someone greets him/her?</li> <li>Does he/she smile when father/mother returns home in the evening?</li> <li>Does he/she greet others by smiling?</li> </ul> | <ul style="list-style-type: none"> <li>क्या बच्चा/बच्ची परिचित लोगों को प्रतिक्रिया देते समय मुस्कुराता/मुस्कुराती है? (दादा-दादी, संबंधी, मित्र)</li> <li>क्या किसी के अभिवादन करने पर बच्चा/बच्ची मुस्कुराता/मुस्कुराती है?</li> <li>जब माता/पिता शाम को घर लौटते हैं तो क्या वह मुस्कुराता है?</li> <li>क्या वह औरों का मुस्कुराहट के साथ अभिवादन करता/करती है?</li> </ul>                                                                                                                                               |
| 3.                                                     | <b>Remain aloof?</b>                                                                                                                                                                                                                                                                                                         | अलग-थलग रहना                                                                                                                                                                                                                                                                                                                                                                                                                                                                                                                |

|    |                                                                                                                                                                                                                                                                                                                                                                                                                                                                                                                                                   |                                                                                                                                                                                                                                                                                                                                                                                                                                                                                                                                                                             |
|----|---------------------------------------------------------------------------------------------------------------------------------------------------------------------------------------------------------------------------------------------------------------------------------------------------------------------------------------------------------------------------------------------------------------------------------------------------------------------------------------------------------------------------------------------------|-----------------------------------------------------------------------------------------------------------------------------------------------------------------------------------------------------------------------------------------------------------------------------------------------------------------------------------------------------------------------------------------------------------------------------------------------------------------------------------------------------------------------------------------------------------------------------|
|    | <ul style="list-style-type: none"> <li>• <i>Does the child prefer to be alone rather in a group?</i></li> <li>• <i>Does the child like playing with a group of children?</i></li> <li>• <i>Does the child want parents' presence while playing or doing any activity?</i></li> <li>• <i>Does the child feel comfortable being in a group?</i></li> <li>• <i>If he/she is engaged in group activity how does he/she react? Does he/she get irritated or fussy?</i></li> <li>• <i>Does he/she ignore the presence of family members?</i></li> </ul> | <ul style="list-style-type: none"> <li>• क्या बच्चा/बच्ची समूह के बजाय अकेले रहना पसंद करता/करती है?</li> <li>• क्या बच्चा/बच्ची, बच्चों के समूह के साथ खेलना पसंद करता/करती है?</li> <li>• क्या बच्चा/बच्ची खेलते या कोई अन्य कार्य करते समय, माता-पिता की उपस्थिति चाहता/चाहती है?</li> <li>• क्या बच्चा समूह में सहज महसूस करता है?</li> <li>• किसी सामूहिक गतिविधि में शामिल करने पर वह किस तरह की प्रतिक्रिया देता/देती है? (क्या वह गुस्सा करता/करती है या चिढ़ जाता/जाती है)?</li> <li>• क्या वह परिवार के सदस्यों की उपस्थिति को अनदेखा करता है/करती है?</li> </ul> |
| 4. | <b>Not reach out to others?</b>                                                                                                                                                                                                                                                                                                                                                                                                                                                                                                                   | लोगों से स्वयं बढ़कर संपर्क नहीं करना                                                                                                                                                                                                                                                                                                                                                                                                                                                                                                                                       |
|    | <ul style="list-style-type: none"> <li>• <i>Does he/she like being with family members? (Parents, siblings, grandparents)</i></li> <li>• <i>Does he/she like playing with his/her siblings/friends?</i></li> <li>• <i>Does he/she like going out with family members?</i></li> <li>• <i>Does he/she run and hug parents/grandparents/close relatives when they return after a break?</i></li> <li>• <i>Is he/she attached to only one family member and ignores others' presence?</i></li> </ul>                                                  | <ul style="list-style-type: none"> <li>• क्या वह परिवार के सदस्यों के साथ रहना पसंद करता/करती है? (माता-पिता, भाई-बहन, दादा-दादी)</li> <li>• क्या वह अपने भाई-बहनों/दोस्तों के साथ पसंद करता/करती हैं।</li> <li>• क्या वह परिवार के सदस्यों के साथ बाहर जाना पसंद करता/करती है?</li> <li>• क्या जब उसके माता-पिता / दादा-दादी / नजदीकी रिश्तेदार कुछ समय बाद वापिस आते हैं तो उन्हें दौड़कर गले लगाता/लगाती है?</li> <li>• क्या वह केवल परिवार के एक ही सदस्य से जुड़ा हुआ है और दूसरों की उपस्थिति को अनदेखा करता है?</li> </ul>                                           |
| 5. | <b>Engage in solitary and repetitive play activities?</b>                                                                                                                                                                                                                                                                                                                                                                                                                                                                                         | अकेले और दोहराने वाले खेल खेलना                                                                                                                                                                                                                                                                                                                                                                                                                                                                                                                                             |
|    | <ul style="list-style-type: none"> <li>• <i>Does the child prefer playing the same game again and again for long duration? (Like playing with crayons/cars/ beads/ strings).</i></li> <li>• <i>If the child's play is interrupted how does he/she react</i></li> </ul>                                                                                                                                                                                                                                                                            | <ul style="list-style-type: none"> <li>• क्या बच्चा लंबी अवधि के लिए बार-बार एक ही खेल खेलना पसंद करता है? (जैसे रंगों/कारों/मोतियों/तारों के साथ खेलना पसंद करना)</li> <li>• बच्चे के खेल में बाधा आने पर वह किस प्रकार प्रतिक्रिया करता/करती है?</li> </ul>                                                                                                                                                                                                                                                                                                               |

|    |                                                                                                                                                                                                                                                                                                                                                                                                                                                                                                                                 |                                                                                                                                                                                                                                                                                                                                                                                                                                                                                                         |
|----|---------------------------------------------------------------------------------------------------------------------------------------------------------------------------------------------------------------------------------------------------------------------------------------------------------------------------------------------------------------------------------------------------------------------------------------------------------------------------------------------------------------------------------|---------------------------------------------------------------------------------------------------------------------------------------------------------------------------------------------------------------------------------------------------------------------------------------------------------------------------------------------------------------------------------------------------------------------------------------------------------------------------------------------------------|
|    | <ul style="list-style-type: none"> <li><i>If undisturbed how long does he/she continue the same activity? Does he/she have any fixated interests? (Like playing by keeping the cars in a line or stacking things). When interrupted how does he/she react?</i></li> </ul>                                                                                                                                                                                                                                                       | <ul style="list-style-type: none"> <li>बच्चे के खेल में रुकावट न करने पर वह कितने समय तक वही खेल खेलना जारी रखता/रखती है?</li> <li>क्या उसका कोई निश्चित लगाव है? (जैसे कारों को लाइन में रखना या चीजों का ढेर बनाकर खेलना)</li> <li>बाधा लाने पर वह किस तरह प्रतिक्रिया देता/देती है?</li> </ul>                                                                                                                                                                                                       |
| 6. | <b>Not maintain peer relationships?</b>                                                                                                                                                                                                                                                                                                                                                                                                                                                                                         | समान बच्चों से संबंध न बनाए रखना                                                                                                                                                                                                                                                                                                                                                                                                                                                                        |
|    | <ul style="list-style-type: none"> <li><i>Does the child have friends?</i></li> <li><i>Does he/she know the names of his/her friends?</i></li> <li><i>Does he/she prefer playing with any particular child?</i></li> <li><i>Does he/she express the wish to play with his/her friends?</i></li> <li><i>Does he/she like attending his/her friend's birthday parties?</i></li> <li><i>Does he/she share his/her experiences with his/her friends?</i></li> <li><i>Does he/she feel close to any particular child?</i></li> </ul> | <ul style="list-style-type: none"> <li>क्या बच्चे के दोस्त हैं?</li> <li>क्या वह अपने दोस्तों के नाम जानता है/जानती है?</li> <li>क्या वह किसी खास बच्चे के साथ खेलना पसंद करता है/करती है?</li> <li>क्या वह अपने दोस्तों के साथ खेलने की इच्छा व्यक्त करता है/करती है?</li> <li>क्या वह अपने दोस्त के जन्मदिन की पार्टियों में भाग लेना पसंद करता है/करती है?</li> <li>क्या वह अपने दोस्तों के साथ अपने अनुभव साक्षा करता है/करती है?</li> <li>क्या वह किसी खास बच्चे के करीब महसूस करता है?</li> </ul> |
| 7. | <b>Not initiate or sustain conversations with others?</b>                                                                                                                                                                                                                                                                                                                                                                                                                                                                       | दूसरों के साथ बातचीत शुरू करने और बनाए रखने में असमर्थ                                                                                                                                                                                                                                                                                                                                                                                                                                                  |
|    | <ul style="list-style-type: none"> <li><i>Does the child interact on his/her own with others?</i></li> <li><i>Does the child ask questions?</i></li> <li><i>Can the child sustain conversation with others (family members, teachers, and friends)?</i></li> <li><i>If yes, check the frequency and duration.</i></li> <li><i>Does he/she respond mostly by nodding his/her head or by saying yes or no?</i></li> </ul>                                                                                                         | <ul style="list-style-type: none"> <li>क्या बच्चा दूसरों के साथ अपनी खुद की बातचीत करता है/करती है?</li> <li>क्या बच्चा सवाल पूछता है?</li> <li>क्या बच्चा दूसरों के साथ बातचीत जारी रख सकता है? परिवार के सदस्यों, शिक्षकों, दोस्तों।</li> <li>क्या वह अपना सिर हिलाकर या हां/ना कहकर ज्यादातर प्रतिक्रिया देता है/देती है?</li> </ul>                                                                                                                                                                 |

|     |                                                                                                                                                                                                                                                                                                                                                                                                                        |                                                                                                                                                                                                                                                                                                                                                                                                            |
|-----|------------------------------------------------------------------------------------------------------------------------------------------------------------------------------------------------------------------------------------------------------------------------------------------------------------------------------------------------------------------------------------------------------------------------|------------------------------------------------------------------------------------------------------------------------------------------------------------------------------------------------------------------------------------------------------------------------------------------------------------------------------------------------------------------------------------------------------------|
| 8.  | <b>Engage in stereotyped and repetitive motor mannerisms?</b>                                                                                                                                                                                                                                                                                                                                                          | बार—बार और दोहरावदार तरीके में व्यस्त रहना                                                                                                                                                                                                                                                                                                                                                                 |
|     | <ul style="list-style-type: none"> <li>Does he/she engage in repetitive behaviours like hand flapping, head nodding, finger wiggling and body rocking?</li> <li>Ask if the child uses any object while engaging in repetitive activities (spinning objects).</li> </ul>                                                                                                                                                | <ul style="list-style-type: none"> <li>क्या वह हाथ हिलाते रहना, सिर हिलाना, उंगली लड़खड़ाना और शरीर को हिलाना जैसे दोहराए जाने वाले व्यवहारों में शामिल रहता है / रहती है?</li> <li>कभी—कभी जांचें कि क्या बच्चा दोहराए जाने वाली गतिविधियों में शामिल होने के दौरान किसी भी वस्तु का उपयोग करता है। (घुमाने वाली वस्तुएं)</li> </ul>                                                                      |
| 9.  | <b>Show attachment to inanimate objects?</b>                                                                                                                                                                                                                                                                                                                                                                           | नजीव वस्तुओं के प्रति लगाव दिखाना                                                                                                                                                                                                                                                                                                                                                                          |
|     | <ul style="list-style-type: none"> <li>Does the child play with strings, threads/ wires?</li> <li>Does the child want to keep any object/toy with him/herself throughout the day?</li> <li>If parent tries to take it away how does he/she react?</li> </ul>                                                                                                                                                           | <ul style="list-style-type: none"> <li>क्या बच्चा रस्सी, धागे / तारों से खेलता है?</li> <li>क्या बच्चा किसी वस्तु / खिलौने को दिनभर अपने साथ रखना चाहता है?</li> <li>अगर माता—पिता इसे दूर करने की कोशिश करते हैं, तो वह कैसे प्रतिक्रिया देता है / देती है?</li> </ul>                                                                                                                                    |
| 10. | <b>Respond to objects/people unusually by smelling, touching or tasting?</b>                                                                                                                                                                                                                                                                                                                                           | वस्तुओं / लोगों को अजीब तरह से महक, स्पर्श या चखने से प्रतिक्रिया करना                                                                                                                                                                                                                                                                                                                                     |
|     | <ul style="list-style-type: none"> <li>Does the child put everything in his/her mouth? (even inedible objects-toys, pens, pencils, crayons)</li> <li>Does the child like to smell things? (Dresses, hair, people)</li> <li>Does the child touch/hug other people?</li> <li>Does he/she express dislike when someone tries to touch him/her?</li> <li>Does the child like to eat food of a particular taste?</li> </ul> | <ul style="list-style-type: none"> <li>क्या बच्चा अपने मुंह में सब कुछ डालता है? (अखाद्य वस्तुएं—खिलौने, पेन, पेंसिल, रंग)</li> <li>क्या बच्चा चीजों को सूंघना पसंद करता है? (कपड़े, बाल, लोग)</li> <li>क्या बच्चा अन्य लोगों को छूता है / गले लगाता है?</li> <li>जब कोई उसे छूने की कोशिश करता है तो वह नापसंद व्यक्त करता है?</li> <li>क्या बच्चा केवल विशेष स्वाद का खाना खाना पसंद करता है?</li> </ul> |
